# Supplementary material
Source: Springer Nature journal article supplement (https://www.springermedizin.de/resource/supplementary/12882_2014_823_MOESM1_ESM.pdf/9454380)

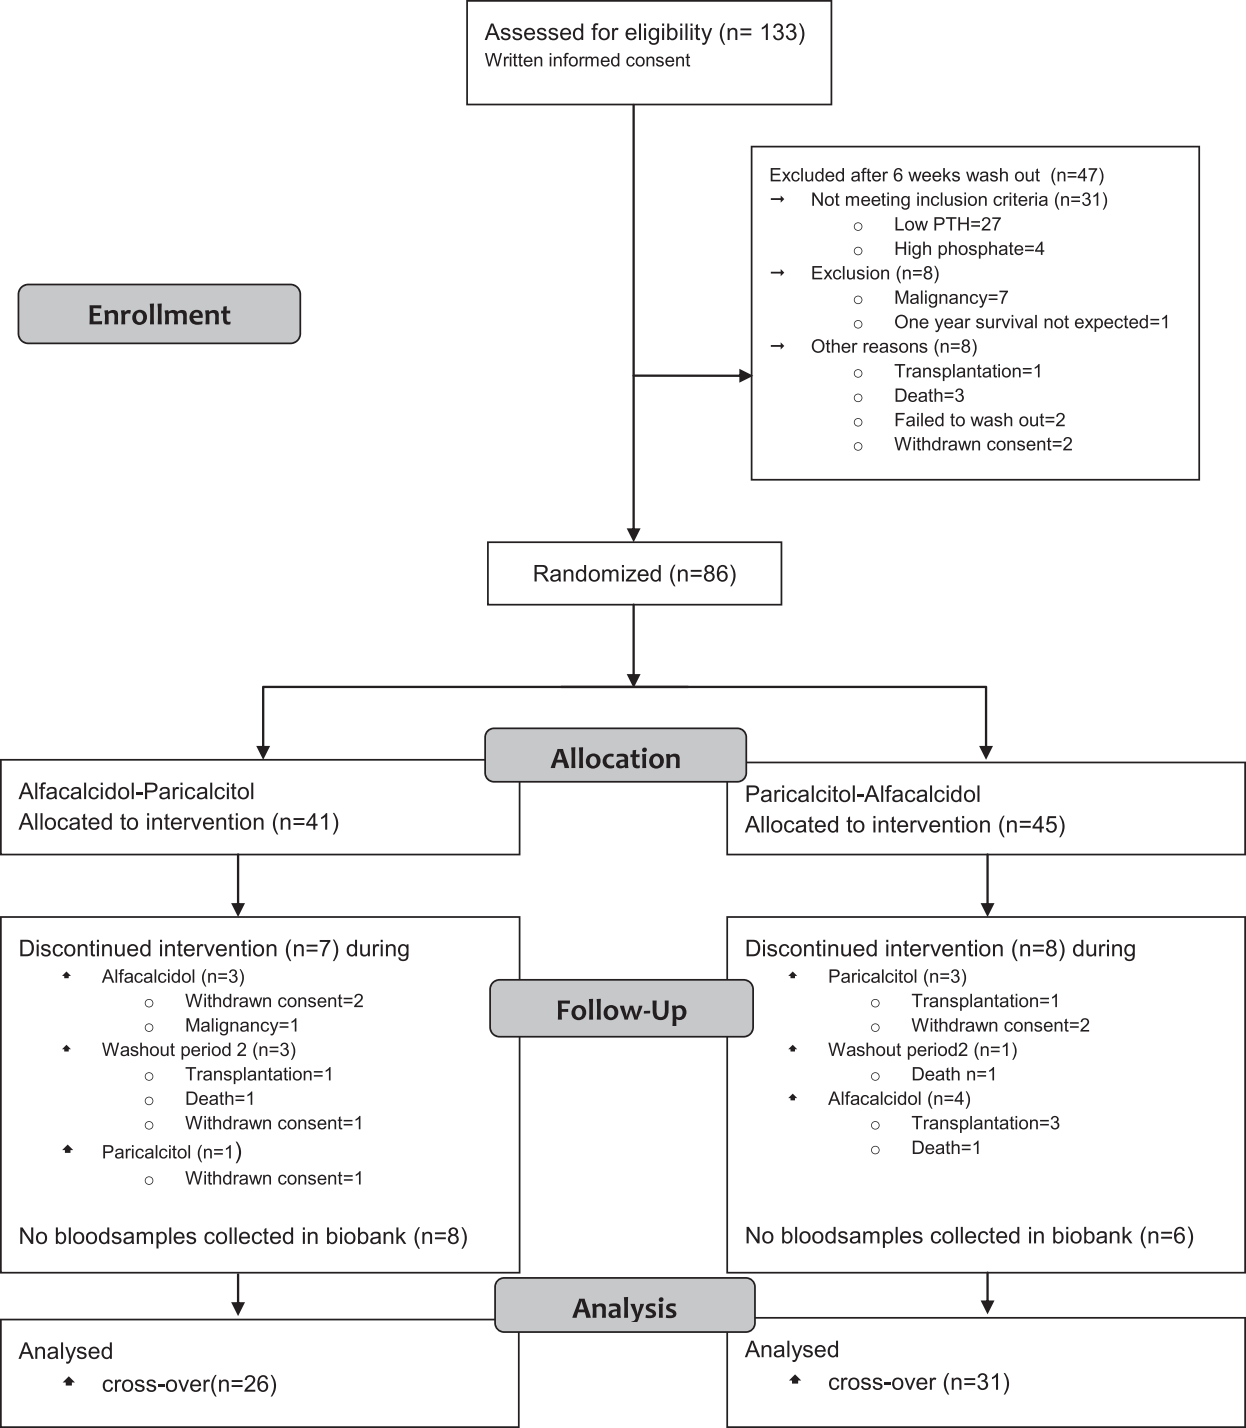

Supplement: MOESM1 [file 9454380]
